# Supplementary figures and images for: Microtubule reorganization during female meiosis in C. elegans
Source: eLife journal article supplement (doi:10.7554/elife.58903), 2021-06-11

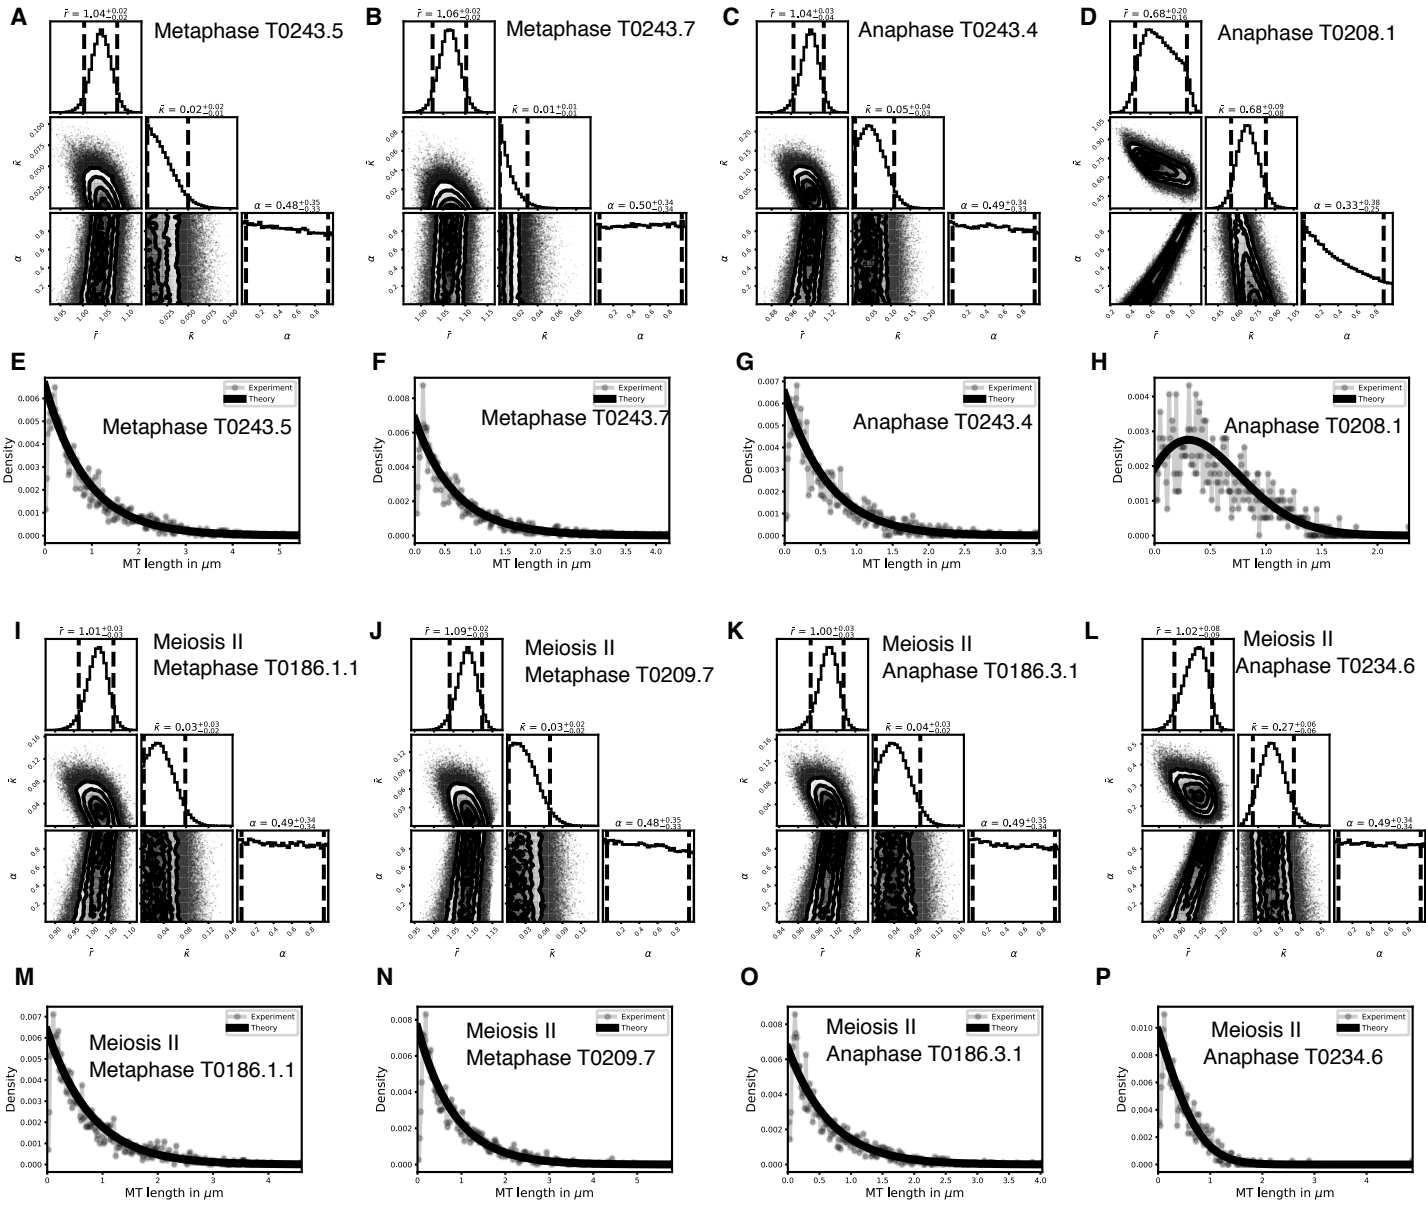

**Figure 8 - Supplement Figure 2**

Supplement: supp [file elife-58903-supp-v1.zip]

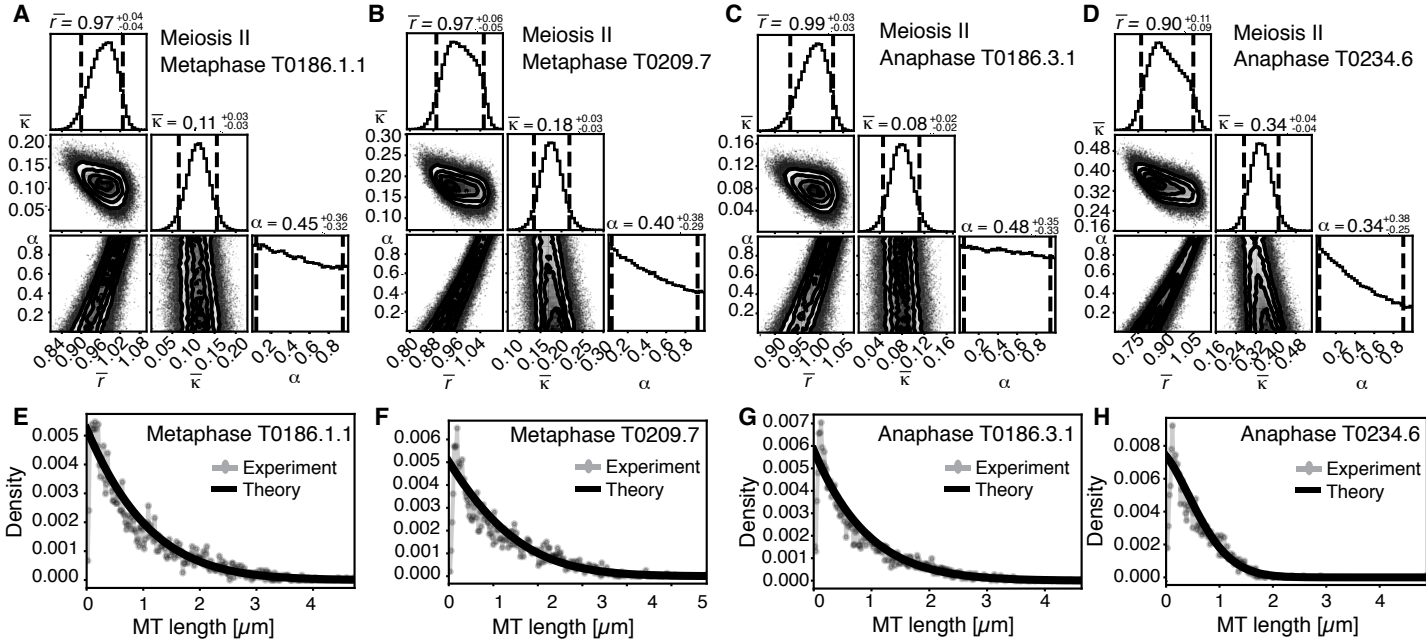

**Figure 6 - Supplement 1**

Supplement: supp [file elife-58903-supp-v1.zip]

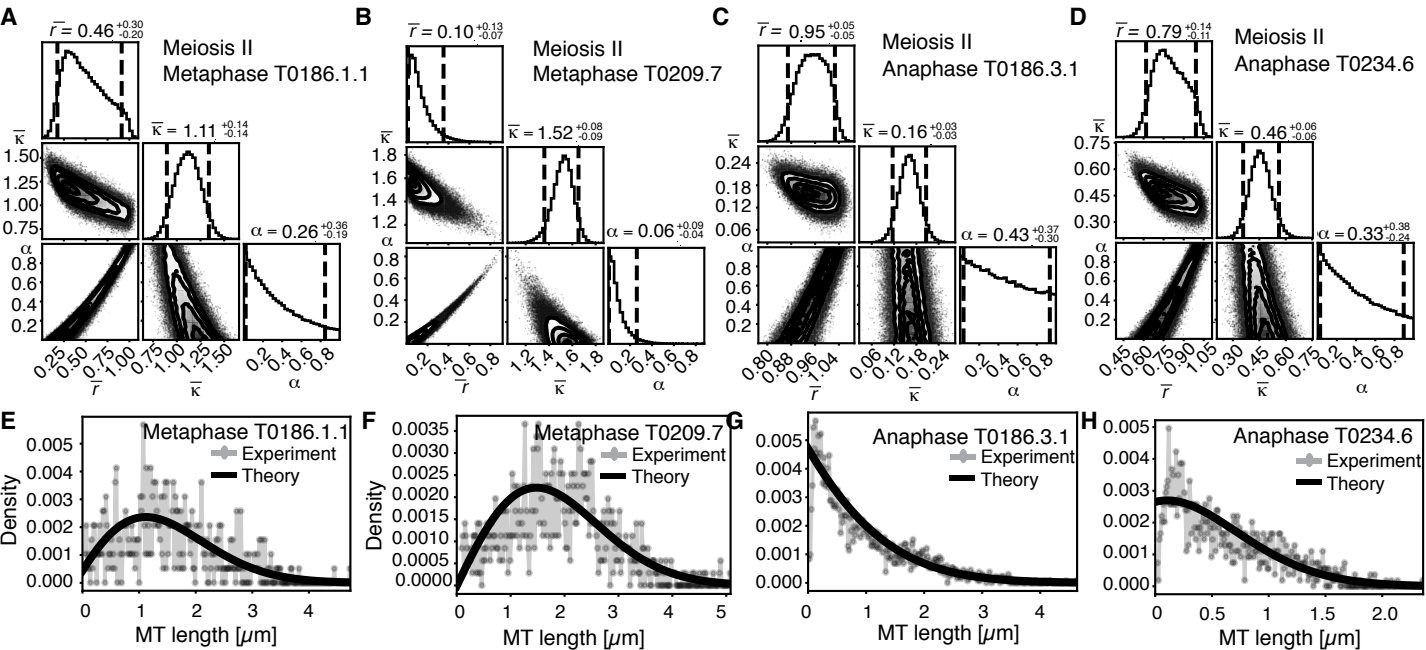

**Figure 8 - Supplement Figure 1**

Supplement: supp [file elife-58903-supp-v1.zip]
